# Supplementary material for: microRNA profiling in Epstein–Barr virus-associated B-cell lymphoma
Source: PubMed Central journal article supplement — Nucleic Acids Res. 2010 Nov 8;39(5):1880–93. doi: 10.1093/nar/gkq1043 (PMC3061055; doi:10.1093/nar/gkq1043), 2010-11-08
Supplement: supp_gkq1043_Imig_Supplement.pdf [file supp_gkq1043_Imig_Supplement.pdf]

# microRNA profiling in EBV-associated B-cell lymphoma

Imig, J.<sup>1\*</sup>, Motsch N.<sup>1\*</sup>, Zhu J.Y.<sup>2</sup>, Barth, S.<sup>1</sup>, Okoniewski, M.<sup>3</sup>, Reineke T.<sup>4</sup>, Tinguely, M.<sup>4</sup>,  
Faggioni, A.<sup>6</sup>, Trivedi, P.<sup>6</sup>, Meister, G.<sup>2,7</sup>, Renner, C.<sup>5\*</sup> and Grässer, F.A.<sup>1\*</sup>

<sup>1</sup>Institute of Microbiology and Hygiene, Department of Virology, University Hospital of Saarland University, Homburg/Saar, Germany

<sup>2</sup>Center for integrated protein Sciences Munich (CIPSM), Laboratory of RNA Biology Max Planck Institute of Biochemistry, Munich, Germany

<sup>3</sup>Functional Genomics Center Zurich, University of Zurich and Swiss Federal Institute of Technology, Zurich,

<sup>4</sup>Institute of Surgical Pathology, University Hospital Zurich, Zurich,

<sup>5</sup>Division of Oncology, Department of Internal Medicine-Oncology, University Hospital Zurich, Zurich, Switzerland

<sup>6</sup>Department of Experimental Medicine and Pathology, Istituto Pasteur-Fondazione Cenci-Bolognetti, La Sapienza University, Rome, Italy

<sup>7</sup>Regensburg University, Biochemistry I, Universitätstrasse 31, Regensburg, Germany

\* These authors contributed equally to this work

<sup>1\*</sup> Friedrich A. Grässer, PhD

Institut für Mikrobiologie und Hygiene

Abteilung Virologie, Gebäude 47

Universitätsklinikum

66421 Homburg/Saar

Germany

Tel.: +49 (0)6841 1623983

E-mail: [graesser@uks.eu](mailto:graesser@uks.eu)

Supplementary Figure 1. Detection of various deregulated miRNAs in samples of primary EBV-negative vs. EBV-positive DLBCL. MiRNAs were extracted from snap-frozen tissue samples of DLBCL and analyzed by northern blotting for the relative levels of the miRNA tested as indicated. U6 snRNA was used for normalization. The relative level for each miRNA assayed is shown in supplementary Table 4.

Supplementary Figure 2. Expression levels of miR-155 and miR-424 in LMP-negative vs. LMP+ samples of EBV-infected DLBCL. Extracts of EBV-positive DLBCL that were either LMP1 positive (open rectangles) or LMP1-negative (dark rectangles) were assayed by qRT-PCR for the relative levels of miR-155 and miR-424.

Supplementary Figure 3. Venn diagrams of predicted miRNA targets for miR-424 and miR-155 using different prediction algorithms as indicated. Overlapping target predictions were further checked by PubMed search for correlation to EBV and lymphoma resulting in a list of potential candidates.

Supplementary Figure 4. miR-424 expression control. miR-424 genomic sequence containing vector pSG5 (pSG5/miR-424) and empty vector (pSG5/Ø) were transiently transfected into HEK 293-T cells. After 48h total RNA was isolated detected by Northern-Blot using specific probes as described. tRNA served as a loading control.

Supplementary Figure 5. Transfection efficacy of FAM-labeled small oligonucleotides in EBV-positive U2932 DLBCL cell lines. Indicated cell lines (U2932/clone B, upper panel, clone 2 lower panel) were either mock transfected (A and D) or with 60pMol FAM-oligonucleotide/ $10^5$  cells (B and E). Flow cytometric analysis was performed post 72h and no obvious cytotoxicity was observed (Dot-Blots A, D, B, E). C and F show fluorescence histogram overlays of control relative to FAM-oligonucleotide transfected cells displaying transfection efficacies ranging between ~86-88% (M = marker).

Supplementary Figure 6. Down-regulation of endogenous miRNAs in EBV-positive U2932 DLBCL cell lines by antisense RNA. Antisense miR-inhibitors for miR-155 (A) and miR-424 (B) were transfected into U2932 EBV clones 2 and B, total RNA was isolated after 72h and miRNAs detected by Northern-Blot. U6 snRNA amount was used for normalization for

densitometric quantification. Numbers indicate relative knock-down efficacies. The result of one representative experiment is shown.

**Supplementary Figure 1**

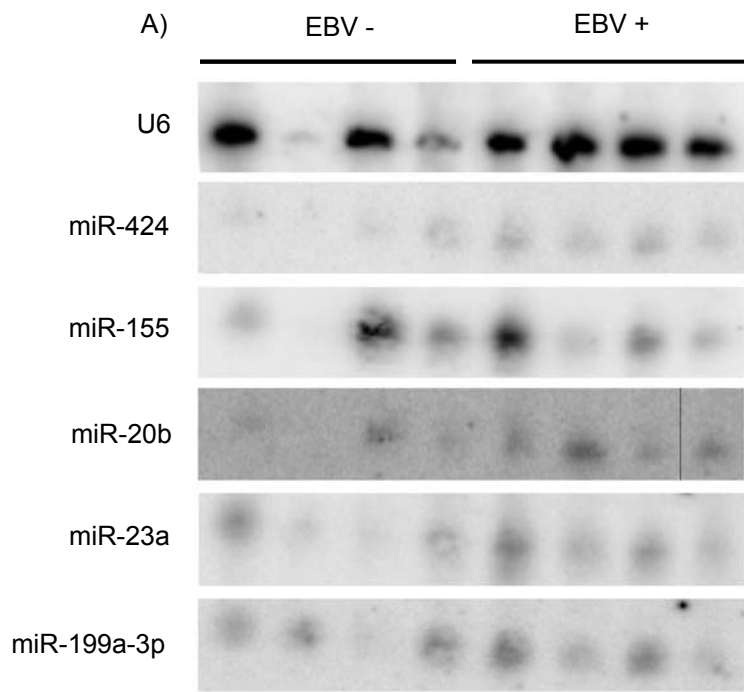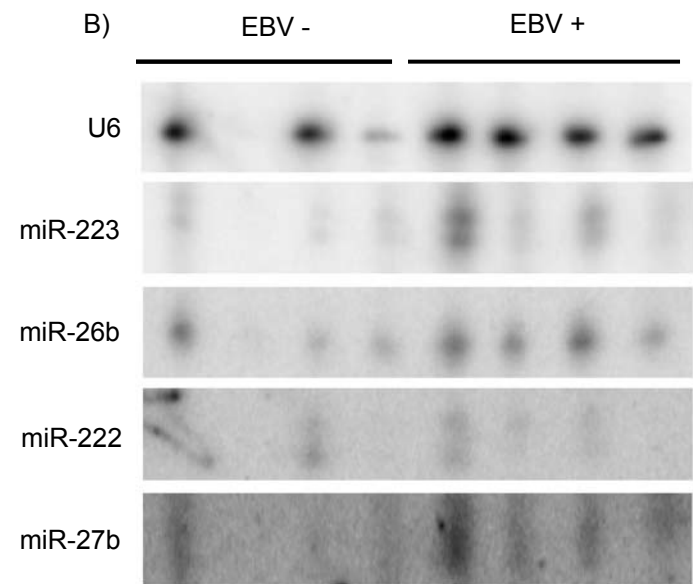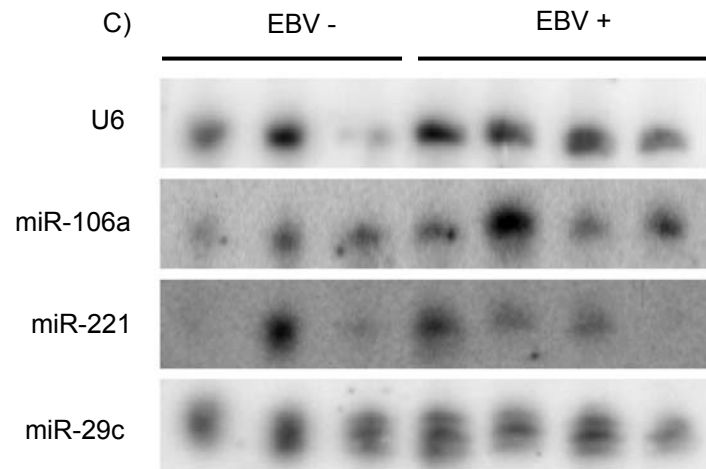

Supplementary Figure 2

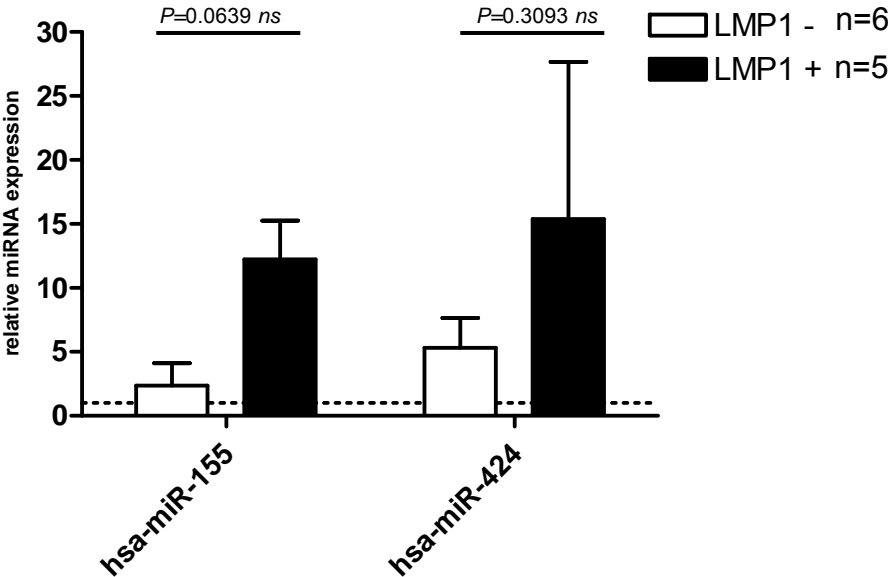

**Supplementary Figure 3**

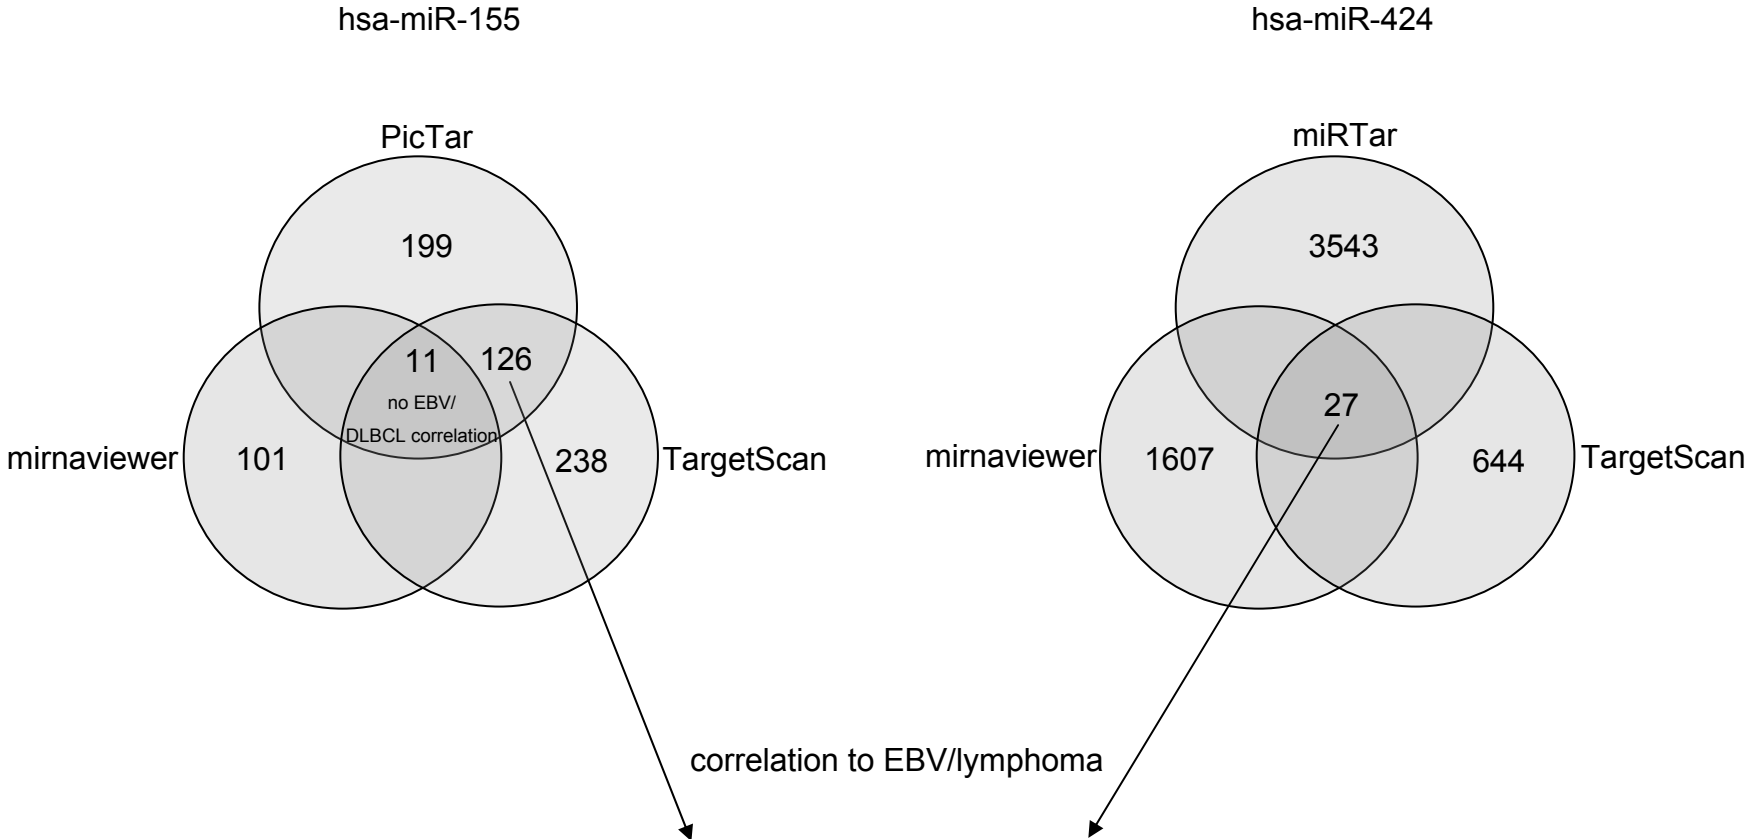

Table 2: results of *in silico* target prediction

| hsa-miR-155  | hsa-miR-424  |
|--------------|--------------|
| <b>MYB</b>   | <b>MYB</b>   |
| ETS1         | DMTF1        |
| MAP3K7IP2    | CUL2         |
| KRAS         | <b>LATS2</b> |
| <i>AICDA</i> | <b>SIAH1</b> |
| SP3          |              |
| SKI          |              |
| SOCS6        |              |

Supplementary Figure 4

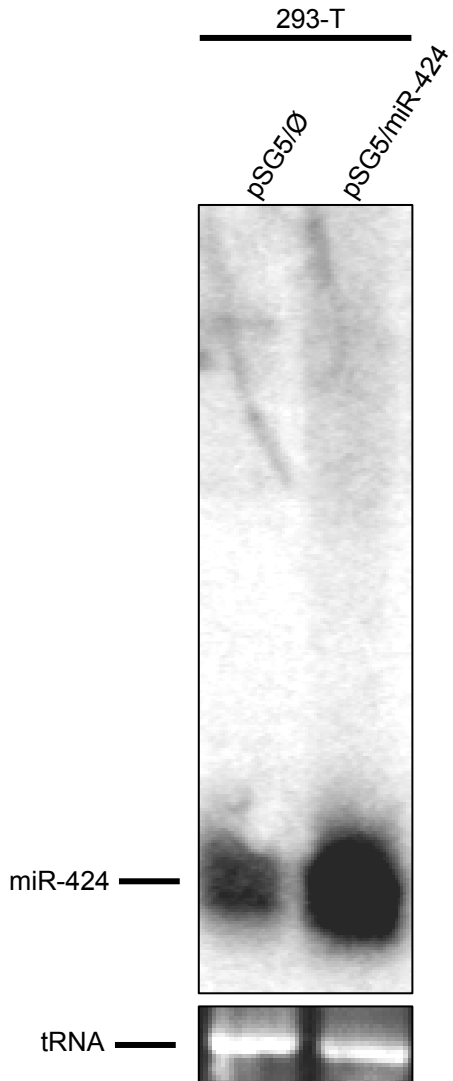

**Supplementary Figure 5**

U2932  
(EBV cloneB)

A) mock transfected

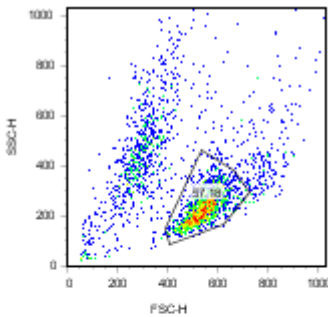

B) FAM-Oligo transfected

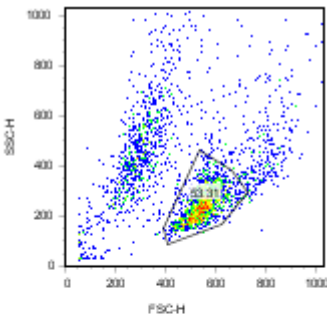

C) histogram overlay

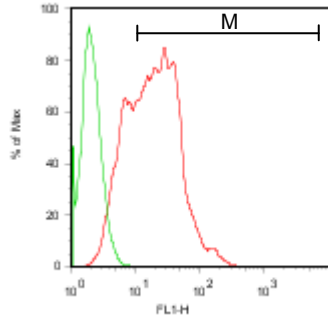

█ mock transfected: M = 0.59%  
█ FAM-oligo transfected: M = 88.63%

U2932  
(EBV clone2)

D) mock transfected

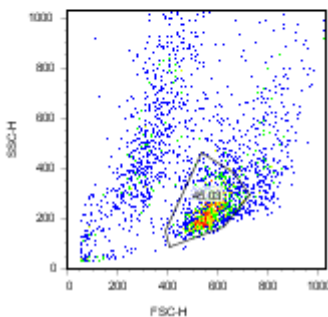

E) FAM-Oligo transfected

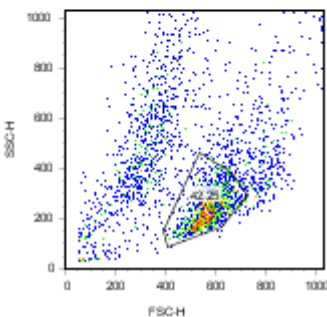

F) histogram overlay

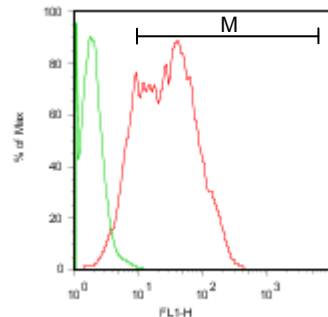

█ mock transfected: M = 0.56%  
█ FAM-oligo transfected: M = 85.97%



Supplementary Figure 6

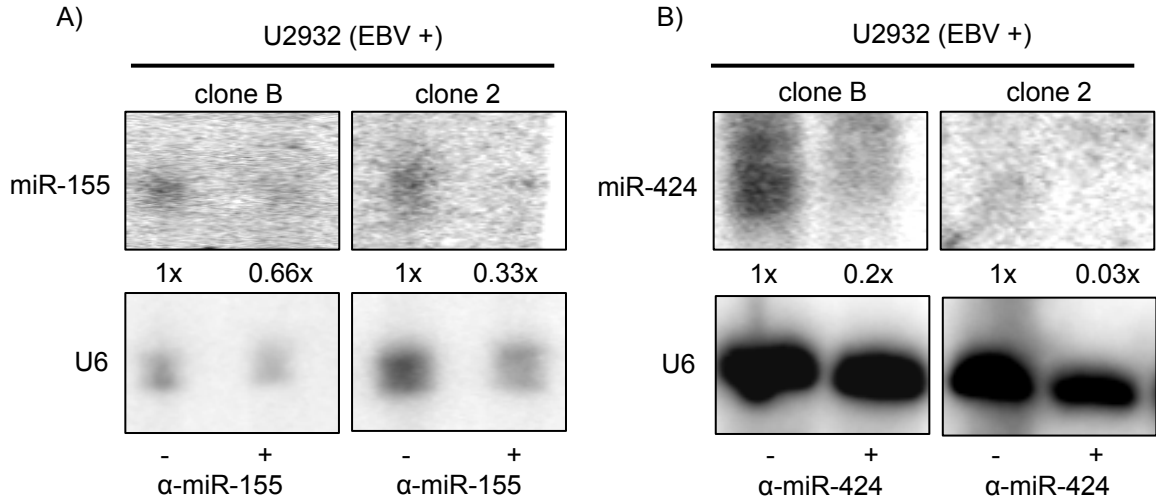

**Supplementary Table 1: Pathological Characteristics of Used Tissues**

| tissue type            | diagnosis      | number | EBV-status | EBV status patient       |
|------------------------|----------------|--------|------------|--------------------------|
| <b>total (qRT-PCR)</b> |                |        |            |                          |
| tonsil                 | reactive       | 3      | n.d        | positive                 |
| B-CL (aggressive)      |                | 10     | negative   | 3x negative, 7x positive |
|                        | DLBCL ABC      | 6      |            |                          |
|                        | DLBCL GC       | 4      |            |                          |
| B-CL (aggressive)      |                | 10     | positive   | all positive             |
|                        | DLBCL ABC      | 4      |            |                          |
|                        | DLBCL          | 3      |            |                          |
|                        | anaplastic LCL | 1      |            |                          |
|                        | BL             | 1      |            |                          |
|                        | MedDLBCL       | 1      |            |                          |
| <b>in library:</b>     |                |        |            |                          |
| B-CL (aggressive)      | DLBCL ABC      | 2      | negative   | 2x pos 2x neg            |
|                        | DLBCL GC       | 2      |            |                          |
| B-CL (aggressive)      | DLBCL ABC      | 2      | positive   | all pos                  |
|                        | DLBCL          | 1      |            |                          |
|                        | MedDLBCL       | 1      |            |                          |
|                        | BL             | 1      |            |                          |

**Supplementary Table 2: EBV-miRNA expression**

| described in miR-Base | reads per library | % of EBV miRNA reads | % of total miRNA reads |
|-----------------------|-------------------|----------------------|------------------------|
| ebv-miR-BART3         | 5                 | 0,92                 | 0,016                  |
| ebv-miR-BART3*        | 2                 | 0,37                 | 0,006                  |
| ebv-miR-BART4         | 5                 | 0,92                 | 0,016                  |
| ebv-miR-BART4*        | 3                 | 0,55                 | 0,009                  |
| ebv-miR-BART1-3p      | 8                 | 1,47                 | 0,025                  |
| ebv-miR-BART1-5p      | 32                | 5,86                 | 0,101                  |
|                       |                   |                      |                        |
| ebv-miR-BART15        | 0                 | 0,00                 | 0,000                  |
| ebv-miR-BART5         | 25                | 4,58                 | 0,079                  |
| ebv-miR-BART5*        | 0                 | 0,00                 | 0,000                  |
| ebv-miR-BART16        | 40                | 7,33                 | 0,126                  |
| ebv-miR-BART17-3p     | 16                | 2,93                 | 0,050                  |
| ebv-miR-BART17-5p     | 9                 | 1,65                 | 0,028                  |
| ebv-miR-BART6-3p      | 9                 | 1,65                 | 0,028                  |
| ebv-miR-BART6-5p      | 17                | 3,11                 | 0,054                  |
|                       |                   |                      |                        |
| ebv-miR-BART21-3p     | 2                 | 0,37                 | 0,006                  |
| ebv-miR-BART21-5p     | 11                | 2,01                 | 0,035                  |
| ebv-miR-BART18-5p     | 0                 | 0,00                 | 0,000                  |
| ebv-miR-BART18-3p     | 2                 | 0,37                 | 0,006                  |
|                       |                   |                      |                        |
| ebv-miR-BART7         | 81                | 14,84                | 0,255                  |
| ebv-miR-BART7*        | 0                 | 0,00                 | 0,000                  |
| ebv-miR-BART8         | 14                | 2,56                 | 0,044                  |
| ebv-miR-BART8*        | 11                | 2,01                 | 0,035                  |
| ebv-miR-BART9         | 11                | 2,01                 | 0,035                  |
| ebv-miR-BART9*        | 1                 | 0,18                 | 0,003                  |
| ebv-miR-BART22        | 81                | 14,84                | 0,255                  |
| ebv-miR-BART10        | 52                | 9,52                 | 0,164                  |
| ebv-miR-BART10*       | 0                 | 0,00                 | 0,000                  |
| ebv-miR-BART11-3p     | 12                | 2,20                 | 0,038                  |
| ebv-miR-BART11-5p     | 47                | 8,61                 | 0,148                  |
| ebv-miR-BART12        | 4                 | 0,73                 | 0,013                  |
| ebv-miR-BART19-3p     | 7                 | 1,28                 | 0,022                  |
| ebv-miR-BART19-5p     | 0                 | 0,00                 | 0,000                  |
| ebv-miR-BART20-3p     | 0                 | 0,00                 | 0,000                  |
| ebv-miR-BART20-5p     | 0                 | 0,00                 | 0,000                  |
| ebv-miR-BART13        | 15                | 2,75                 | 0,047                  |
| ebv-miR-BART13*       | 4                 | 0,73                 | 0,013                  |
| ebv-miR-BART14        | 16                | 2,93                 | 0,050                  |
| ebv-miR-BART14*       | 0                 | 0,00                 | 0,000                  |
|                       |                   |                      |                        |
| ebv-miR-BART2-5p      | 4                 | 0,73                 | 0,013                  |
| ebv-miR-BART2-3p      | 0                 | 0,00                 | 0,000                  |
|                       |                   |                      |                        |
| ebv-miR-BHRF1-1       | 0                 | 0,00                 | 0,000                  |
| ebv-miR-BHRF1-2       | 0                 | 0,00                 | 0,000                  |
| ebv-miR-BHRF1-2*      | 0                 | 0,00                 | 0,000                  |
| ebv-miR-BHRF1-3       | 0                 | 0,00                 | 0,000                  |
| sum                   | 546               |                      | 31725                  |

**Supplementary Table 3**

| DLBCL library (EBV-) |        |              | DLBCL library (EBV+) |        |              |
|----------------------|--------|--------------|----------------------|--------|--------------|
| MiRNA-species        | read   | relative     | miRNA-species        | read   | relative     |
|                      | number | expression % |                      | number | expression % |
| hsa-miR-16           | 10664  | 19,586       | hsa-miR-16           | 4672   | 14,678       |
| hsa-miR-155          | 8332   | 15,303       | hsa-miR-21           | 2967   | 9,321        |
| hsa-miR-20a          | 3617   | 6,643        | hsa-miR-17           | 2882   | 9,054        |
| hsa-miR-21           | 3535   | 6,492        | hsa-miR-20a          | 2879   | 9,045        |
| hsa-miR-17           | 2882   | 5,293        | hsa-miR-15b          | 1561   | 4,904        |
| hsa-miR-15a          | 2858   | 5,249        | hsa-miR-15a          | 1353   | 4,251        |
| hsa-miR-15b          | 2676   | 4,915        | hsa-miR-27a          | 1265   | 3,974        |
| hsa-miR-106b         | 1595   | 2,929        | hsa-miR-155          | 1098   | 3,449        |
| hsa-miR-221          | 873    | 1,603        | hsa-miR-106b         | 846    | 2,658        |
| hsa-miR-26a          | 810    | 1,488        | hsa-miR-199a-3p      | 791    | 2,485        |
| hsa-miR-103          | 801    | 1,471        | hsa-miR-103          | 624    | 1,960        |
| hsa-miR-27a          | 751    | 1,379        | hsa-miR-23a          | 582    | 1,828        |
| hsa-miR-92a          | 721    | 1,324        | hsa-miR-26b          | 516    | 1,621        |
| hsa-miR-25           | 706    | 1,297        | hsa-miR-26a          | 465    | 1,461        |
| hsa-miR-93           | 699    | 1,284        | hsa-miR-126          | 430    | 1,351        |
| hsa-miR-126          | 687    | 1,262        | hsa-miR-92a          | 423    | 1,329        |
| hsa-miR-29c          | 625    | 1,148        | hsa-miR-25           | 422    | 1,326        |
| hsa-miR-142-3p       | 622    | 1,142        | hsa-miR-142-3p       | 413    | 1,297        |
| hsa-miR-29a          | 472    | 0,867        | hsa-miR-191          | 331    | 1,040        |
| hsa-miR-146a         | 468    | 0,860        | hsa-miR-424          | 298    | 0,936        |
| hsa-miR-30b          | 462    | 0,849        | hsa-miR-142-5p       | 283    | 0,889        |
| hsa-miR-191          | 457    | 0,839        | hsa-miR-29a          | 268    | 0,842        |
| hsa-miR-23a          | 439    | 0,806        | hsa-miR-93           | 266    | 0,836        |
| hsa-miR-142-5p       | 436    | 0,801        | hsa-miR-30b          | 252    | 0,792        |
| hsa-miR-151-5p       | 418    | 0,768        | hsa-miR-27b          | 235    | 0,738        |
| hsa-miR-26b          | 375    | 0,689        | hsa-miR-19b          | 216    | 0,679        |
| hsa-miR-199a-3p      | 354    | 0,650        | hsa-miR-195          | 201    | 0,631        |
| hsa-miR-148a         | 298    | 0,547        | hsa-miR-146a         | 189    | 0,594        |
| hsa-miR-20b          | 298    | 0,547        | hsa-miR-223          | 160    | 0,503        |
| hsa-miR-222          | 282    | 0,518        | hsa-miR-29c          | 158    | 0,496        |
| hsa-miR-19b          | 263    | 0,483        | hsa-miR-23b          | 139    | 0,437        |
| hsa-miR-29b          | 241    | 0,443        | hsa-miR-24           | 136    | 0,427        |
| hsa-miR-374b         | 232    | 0,426        | hsa-miR-374b         | 131    | 0,412        |
| hsa-miR-195          | 204    | 0,375        | hsa-miR-151-5p       | 129    | 0,405        |
| hsa-miR-320          | 193    | 0,354        | hsa-miR-221          | 129    | 0,405        |
| hsa-miR-425          | 183    | 0,336        | hsa-miR-148a         | 126    | 0,396        |
| hsa-let-7g           | 169    | 0,310        | hsa-miR-22           | 114    | 0,358        |
| hsa-miR-185          | 164    | 0,301        | hsa-let-7f           | 107    | 0,336        |
| hsa-miR-106a         | 163    | 0,299        | hsa-miR-425          | 103    | 0,324        |
| hsa-let-7f           | 143    | 0,263        | hsa-miR-199a-5p      | 100    | 0,314        |
| hsa-miR-18a          | 139    | 0,255        | hsa-miR-101          | 99     | 0,311        |
| hsa-miR-30c          | 135    | 0,248        | hsa-let-7g           | 93     | 0,292        |
| hsa-miR-424          | 135    | 0,248        | hsa-miR-185          | 93     | 0,292        |
| hsa-miR-17*          | 124    | 0,228        | hsa-miR-34a          | 90     | 0,283        |
| hsa-miR-30d          | 123    | 0,226        | hsa-miR-30c          | 88     | 0,276        |
| hsa-miR-140-3p       | 121    | 0,222        | hsa-miR-17*          | 87     | 0,273        |
| hsa-miR-24           | 118    | 0,217        | hsa-miR-30e          | 82     | 0,258        |
| hsa-miR-23b          | 113    | 0,208        | hsa-let-7a           | 78     | 0,245        |
| hsa-miR-27b          | 113    | 0,208        | hsa-miR-133a         | 69     | 0,217        |
| hsa-miR-22           | 109    | 0,200        | hsa-miR-222          | 66     | 0,207        |
| hsa-miR-128a         | 102    | 0,187        | hsa-miR-320          | 65     | 0,204        |
| hsa-miR-34a          | 102    | 0,187        | hsa-miR-497          | 61     | 0,192        |

|                 |     |       |                 |    |       |
|-----------------|-----|-------|-----------------|----|-------|
| hsa-miR-30e     | 101 | 0,185 | hsa-miR-29b     | 55 | 0,173 |
| hsa-miR-101     | 100 | 0,184 | hsa-miR-140-3p  | 53 | 0,167 |
| hsa-miR-361-5p  | 100 | 0,184 | hsa-miR-378     | 52 | 0,163 |
| hsa-miR-497     | 85  | 0,156 | hsa-miR-126*    | 51 | 0,160 |
| hsa-miR-146b-5p | 79  | 0,145 | hsa-miR-1       | 50 | 0,157 |
| hsa-miR-199a-5p | 79  | 0,145 | hsa-miR-30d     | 50 | 0,157 |
| hsa-miR-652     | 79  | 0,145 | hsa-miR-590-3p  | 50 | 0,157 |
| hsa-let-7a      | 74  | 0,136 | hsa-miR-152     | 48 | 0,151 |
| hsa-miR-28-5p   | 70  | 0,129 | hsa-miR-18a     | 48 | 0,151 |
| hsa-miR-374a    | 70  | 0,129 | hsa-miR-374a    | 48 | 0,151 |
| hsa-miR-151-3p  | 67  | 0,123 | hsa-miR-7       | 48 | 0,151 |
| hsa-miR-590-3p  | 65  | 0,119 | hsa-miR-22*     | 47 | 0,148 |
| hsa-miR-223     | 64  | 0,118 | hsa-miR-361-5p  | 46 | 0,145 |
| hsa-miR-484     | 60  | 0,110 | hsa-miR-181a    | 45 | 0,141 |
| hsa-miR-342-3p  | 53  | 0,097 | hsa-miR-451     | 44 | 0,138 |
| hsa-miR-32      | 50  | 0,092 | hsa-miR-106a    | 42 | 0,132 |
| hsa-miR-16-2*   | 45  | 0,083 | hsa-miR-146b-5p | 42 | 0,132 |
| hsa-miR-363     | 45  | 0,083 | hsa-miR-19a     | 41 | 0,129 |
| hsa-miR-145     | 42  | 0,077 | hsa-miR-128a    | 37 | 0,116 |
| hsa-let-7i      | 35  | 0,064 | hsa-miR-342-3p  | 34 | 0,107 |
| hsa-miR-140-5p  | 34  | 0,062 | hsa-miR-181b    | 31 | 0,097 |
| hsa-miR-194     | 34  | 0,062 | hsa-miR-28-5p   | 31 | 0,097 |
| hsa-miR-221*    | 34  | 0,062 | hsa-miR-150     | 30 | 0,094 |
| hsa-miR-200c    | 32  | 0,059 | hsa-miR-652     | 27 | 0,085 |
| hsa-miR-532-5p  | 32  | 0,059 | hsa-miR-210     | 23 | 0,072 |
| hsa-miR-181a    | 31  | 0,057 | hsa-miR-20b     | 22 | 0,069 |
| hsa-miR-455-3p  | 30  | 0,055 | hsa-miR-21*     | 22 | 0,069 |
| hsa-miR-7       | 29  | 0,053 | hsa-miR-32      | 22 | 0,069 |
| hsa-miR-22*     | 28  | 0,051 | hsa-miR-7-1*    | 22 | 0,069 |
| hsa-miR-150     | 27  | 0,050 | hsa-miR-499-5p  | 21 | 0,066 |
| hsa-miR-301a    | 27  | 0,050 | hsa-miR-125b    | 20 | 0,063 |
| hsa-miR-708     | 27  | 0,050 | hsa-miR-194     | 20 | 0,063 |
| hsa-miR-378     | 26  | 0,048 | hsa-miR-484     | 20 | 0,063 |
| hsa-miR-454     | 26  | 0,048 | hsa-let-7d      | 19 | 0,060 |
| hsa-miR-28-3p   | 25  | 0,046 | hsa-miR-30e*    | 19 | 0,060 |
| hsa-miR-152     | 24  | 0,044 | hsa-miR-455-3p  | 19 | 0,060 |
| hsa-miR-324-3p  | 24  | 0,044 | hsa-miR-143     | 18 | 0,057 |
| hsa-miR-361-3p  | 24  | 0,044 | hsa-miR-130b    | 17 | 0,053 |
| hsa-miR-125a-5p | 23  | 0,042 | hsa-miR-28-3p   | 17 | 0,053 |
| hsa-miR-181b    | 23  | 0,042 | hsa-let-7i      | 16 | 0,050 |
| hsa-miR-21*     | 23  | 0,042 | hsa-miR-145     | 16 | 0,050 |
| hsa-miR-218     | 23  | 0,042 | hsa-miR-532-5p  | 16 | 0,050 |
| hsa-miR-186     | 21  | 0,039 | hsa-miR-9*      | 15 | 0,047 |
| hsa-miR-362-3p  | 20  | 0,037 | hsa-let-7b      | 14 | 0,044 |
| hsa-let-7b      | 19  | 0,035 | hsa-miR-190     | 14 | 0,044 |
| hsa-miR-130b    | 19  | 0,035 | hsa-miR-206     | 14 | 0,044 |
| hsa-miR-148b    | 19  | 0,035 | hsa-miR-148b    | 13 | 0,041 |
| hsa-miR-30e*    | 19  | 0,035 | hsa-miR-182     | 13 | 0,041 |
| hsa-miR-106b*   | 18  | 0,033 | hsa-miR-362-3p  | 13 | 0,041 |
| hsa-miR-182     | 18  | 0,033 | hsa-miR-574-3p  | 13 | 0,041 |
| hsa-miR-10b     | 17  | 0,031 | hsa-miR-590-5p  | 13 | 0,041 |
| hsa-miR-125b    | 17  | 0,031 | hsa-miR-151-3p  | 12 | 0,038 |
| hsa-miR-143     | 16  | 0,029 | hsa-miR-16-2*   | 12 | 0,038 |
| hsa-miR-192     | 16  | 0,029 | hsa-miR-193b    | 12 | 0,038 |
| hsa-miR-19a     | 16  | 0,029 | hsa-miR-454     | 12 | 0,038 |
| hsa-miR-210     | 16  | 0,029 | hsa-let-7g*     | 11 | 0,035 |

|                 |    |       |                 |    |       |
|-----------------|----|-------|-----------------|----|-------|
| hsa-let-7d      | 15 | 0,028 | hsa-miR-140-5p  | 11 | 0,035 |
| hsa-let-7i*     | 15 | 0,028 | hsa-miR-186     | 11 | 0,035 |
| hsa-miR-421     | 15 | 0,028 | hsa-miR-192     | 11 | 0,035 |
| hsa-miR-766     | 14 | 0,026 | hsa-miR-10b     | 10 | 0,031 |
| hsa-miR-423-3p  | 13 | 0,024 | hsa-miR-132     | 10 | 0,031 |
| hsa-miR-582-5p  | 13 | 0,024 | hsa-miR-199b-5p | 10 | 0,031 |
| hsa-miR-103-2*  | 12 | 0,022 | hsa-miR-218     | 10 | 0,031 |
| hsa-miR-365     | 12 | 0,022 | hsa-miR-107     | 9  | 0,028 |
| hsa-miR-378*    | 12 | 0,022 | hsa-miR-24-2*   | 9  | 0,028 |
| hsa-miR-451     | 12 | 0,022 | hsa-miR-30a     | 9  | 0,028 |
| hsa-miR-500     | 12 | 0,022 | hsa-miR-644     | 9  | 0,028 |
| hsa-miR-660     | 11 | 0,020 | hsa-miR-9       | 9  | 0,028 |
| hsa-miR-130a    | 10 | 0,018 | hsa-let-7a*     | 8  | 0,025 |
| hsa-miR-139-5p  | 10 | 0,018 | hsa-miR-103-2*  | 8  | 0,025 |
| hsa-miR-215     | 10 | 0,018 | hsa-miR-196a    | 8  | 0,025 |
| hsa-miR-345     | 10 | 0,018 | hsa-miR-214     | 8  | 0,025 |
| hsa-miR-502-3p  | 10 | 0,018 | hsa-miR-365     | 8  | 0,025 |
| hsa-let-7a*     | 9  | 0,017 | hsa-miR-421     | 8  | 0,025 |
| hsa-let-7f-2*   | 9  | 0,017 | hsa-miR-503     | 8  | 0,025 |
| hsa-miR-132     | 9  | 0,017 | hsa-miR-598     | 8  | 0,025 |
| hsa-miR-15b*    | 9  | 0,017 | hsa-miR-1301    | 7  | 0,022 |
| hsa-miR-18a*    | 9  | 0,017 | hsa-miR-139-5p  | 7  | 0,022 |
| hsa-miR-18b     | 9  | 0,017 | hsa-miR-340     | 7  | 0,022 |
| hsa-miR-30a     | 9  | 0,017 | hsa-miR-423-3p  | 7  | 0,022 |
| hsa-miR-423-5p  | 9  | 0,017 | hsa-miR-766     | 7  | 0,022 |
| hsa-miR-598     | 9  | 0,017 | hsa-miR-301a    | 6  | 0,019 |
| hsa-miR-99b     | 9  | 0,017 | hsa-miR-376a    | 6  | 0,019 |
| hsa-miR-193b    | 8  | 0,015 | hsa-miR-376c    | 6  | 0,019 |
| hsa-miR-20a*    | 8  | 0,015 | hsa-miR-378*    | 6  | 0,019 |
| hsa-miR-768-3p  | 8  | 0,015 | hsa-miR-500     | 6  | 0,019 |
| hsa-miR-199b-5p | 7  | 0,013 | hsa-miR-100     | 5  | 0,016 |
| hsa-miR-30a*    | 7  | 0,013 | hsa-miR-125a-5p | 5  | 0,016 |
| hsa-miR-362-5p  | 7  | 0,013 | hsa-miR-130a    | 5  | 0,016 |
| hsa-miR-486-5p  | 7  | 0,013 | hsa-miR-183     | 5  | 0,016 |
| hsa-miR-7-1*    | 7  | 0,013 | hsa-miR-221*    | 5  | 0,016 |
| hsa-miR-942     | 7  | 0,013 | hsa-miR-30a*    | 5  | 0,016 |
| hsa-miR-100     | 6  | 0,011 | hsa-miR-335     | 5  | 0,016 |
| hsa-miR-223*    | 6  | 0,011 | hsa-miR-671-5p  | 5  | 0,016 |
| hsa-miR-330-3p  | 6  | 0,011 | hsa-miR-15b*    | 4  | 0,013 |
| hsa-miR-505     | 6  | 0,011 | hsa-miR-20a*    | 4  | 0,013 |
| hsa-miR-532-3p  | 6  | 0,011 | hsa-miR-324-3p  | 4  | 0,013 |
| hsa-miR-590-5p  | 6  | 0,011 | hsa-miR-33a*    | 4  | 0,013 |
| hsa-miR-98      | 6  | 0,011 | hsa-miR-345     | 4  | 0,013 |
| hsa-miR-1307    | 5  | 0,009 | hsa-miR-34a*    | 4  | 0,013 |
| hsa-miR-141     | 5  | 0,009 | hsa-miR-450a    | 4  | 0,013 |
| hsa-miR-155*    | 5  | 0,009 | hsa-miR-574-5p  | 4  | 0,013 |
| hsa-miR-15a*    | 5  | 0,009 | hsa-miR-628-3p  | 4  | 0,013 |
| hsa-miR-192*    | 5  | 0,009 | hsa-miR-768-5p  | 4  | 0,013 |
| hsa-miR-29b-2*  | 5  | 0,009 | hsa-miR-96      | 4  | 0,013 |
| hsa-miR-340     | 5  | 0,009 | hsa-let-7e      | 3  | 0,009 |
| hsa-miR-450a    | 5  | 0,009 | hsa-let-7f-1*   | 3  | 0,009 |
| hsa-miR-501-3p  | 5  | 0,009 | hsa-miR-196b    | 3  | 0,009 |
| hsa-miR-576-3p  | 5  | 0,009 | hsa-miR-212     | 3  | 0,009 |
| hsa-miR-92b     | 5  | 0,009 | hsa-miR-223*    | 3  | 0,009 |
| hsa-let-7g*     | 4  | 0,007 | hsa-miR-424*    | 3  | 0,009 |
| hsa-miR-190     | 4  | 0,007 | hsa-miR-493     | 3  | 0,009 |

|                 |   |       |                 |   |       |
|-----------------|---|-------|-----------------|---|-------|
| hsa-miR-196b    | 4 | 0,007 | hsa-miR-505     | 3 | 0,009 |
| hsa-miR-224     | 4 | 0,007 | hsa-miR-624*    | 3 | 0,009 |
| hsa-miR-335*    | 4 | 0,007 | hsa-miR-942     | 3 | 0,009 |
| hsa-miR-628-5p  | 4 | 0,007 | hsa-miR-95      | 3 | 0,009 |
| hsa-miR-9*      | 4 | 0,007 | hsa-let-7c      | 2 | 0,006 |
| hsa-miR-93*     | 4 | 0,007 | hsa-let-7d*     | 2 | 0,006 |
| hsa-let-7d*     | 3 | 0,006 | hsa-miR-10a     | 2 | 0,006 |
| hsa-let-7f-1*   | 3 | 0,006 | hsa-miR-1-2*    | 2 | 0,006 |
| hsa-miR-144     | 3 | 0,006 | hsa-miR-1304    | 2 | 0,006 |
| hsa-miR-145*    | 3 | 0,006 | hsa-miR-138     | 2 | 0,006 |
| hsa-miR-324-5p  | 3 | 0,006 | hsa-miR-155*    | 2 | 0,006 |
| hsa-miR-330-5p  | 3 | 0,006 | hsa-miR-18a*    | 2 | 0,006 |
| hsa-miR-33a*    | 3 | 0,006 | hsa-miR-193a-3p | 2 | 0,006 |
| hsa-miR-340*    | 3 | 0,006 | hsa-miR-197     | 2 | 0,006 |
| hsa-miR-34a*    | 3 | 0,006 | hsa-miR-19b-1*  | 2 | 0,006 |
| hsa-miR-425*    | 3 | 0,006 | hsa-miR-200a    | 2 | 0,006 |
| hsa-miR-455-5p  | 3 | 0,006 | hsa-miR-200c    | 2 | 0,006 |
| hsa-miR-501-5p  | 3 | 0,006 | hsa-miR-224     | 2 | 0,006 |
| hsa-miR-551b    | 3 | 0,006 | hsa-miR-301b    | 2 | 0,006 |
| hsa-miR-574-3p  | 3 | 0,006 | hsa-miR-326     | 2 | 0,006 |
| hsa-miR-744     | 3 | 0,006 | hsa-miR-374b*   | 2 | 0,006 |
| hsa-miR-96      | 3 | 0,006 | hsa-miR-432     | 2 | 0,006 |
| hsa-let-7e      | 2 | 0,004 | hsa-miR-486-5p  | 2 | 0,006 |
| hsa-miR-183     | 2 | 0,004 | hsa-miR-495     | 2 | 0,006 |
| hsa-miR-197     | 2 | 0,004 | hsa-miR-501-5p  | 2 | 0,006 |
| hsa-miR-208     | 2 | 0,004 | hsa-miR-515-5p  | 2 | 0,006 |
| hsa-miR-24-2*   | 2 | 0,004 | hsa-miR-532-3p  | 2 | 0,006 |
| hsa-miR-296-5p  | 2 | 0,004 | hsa-miR-651     | 2 | 0,006 |
| hsa-miR-29c*    | 2 | 0,004 | hsa-miR-655     | 2 | 0,006 |
| hsa-miR-331-3p  | 2 | 0,004 | hsa-miR-708     | 2 | 0,006 |
| hsa-miR-339-3p  | 2 | 0,004 | hsa-miR-768-3p  | 2 | 0,006 |
| hsa-miR-499-5p  | 2 | 0,004 | hsa-miR-923     | 2 | 0,006 |
| hsa-miR-502-5p  | 2 | 0,004 | hsa-miR-92a-1*  | 2 | 0,006 |
| hsa-miR-511     | 2 | 0,004 | hsa-miR-93*     | 2 | 0,006 |
| hsa-miR-584     | 2 | 0,004 | hsa-miR-99b     | 2 | 0,006 |
| hsa-miR-624*    | 2 | 0,004 | hsa-let-7b*     | 1 | 0,003 |
| hsa-miR-628-3p  | 2 | 0,004 | hsa-let-7i*     | 1 | 0,003 |
| hsa-miR-671-5p  | 2 | 0,004 | hsa-miR-130b*   | 1 | 0,003 |
| hsa-miR-769-5p  | 2 | 0,004 | hsa-miR-135b    | 1 | 0,003 |
| hsa-miR-874     | 2 | 0,004 | hsa-miR-138-1*  | 1 | 0,003 |
| hsa-miR-923     | 2 | 0,004 | hsa-miR-141     | 1 | 0,003 |
| hsa-miR-940     | 2 | 0,004 | hsa-miR-144     | 1 | 0,003 |
| hsa-miR-106a*   | 1 | 0,002 | hsa-miR-181c    | 1 | 0,003 |
| hsa-miR-10a     | 1 | 0,002 | hsa-miR-181d    | 1 | 0,003 |
| hsa-miR-10b*    | 1 | 0,002 | hsa-miR-187     | 1 | 0,003 |
| hsa-miR-124     | 1 | 0,002 | hsa-miR-188-3p  | 1 | 0,003 |
| hsa-miR-138     | 1 | 0,002 | hsa-miR-188-5p  | 1 | 0,003 |
| hsa-miR-138-1*  | 1 | 0,002 | hsa-miR-190b    | 1 | 0,003 |
| hsa-miR-146b-3p | 1 | 0,002 | hsa-miR-192*    | 1 | 0,003 |
| hsa-miR-153     | 1 | 0,002 | hsa-miR-193a-5p | 1 | 0,003 |
| hsa-miR-181c    | 1 | 0,002 | hsa-miR-208     | 1 | 0,003 |
| hsa-miR-181d    | 1 | 0,002 | hsa-miR-208b    | 1 | 0,003 |
| hsa-miR-188-3p  | 1 | 0,002 | hsa-miR-214*    | 1 | 0,003 |
| hsa-miR-190b    | 1 | 0,002 | hsa-miR-29a*    | 1 | 0,003 |
| hsa-miR-196a    | 1 | 0,002 | hsa-miR-31*     | 1 | 0,003 |
| hsa-miR-19b-1*  | 1 | 0,002 | hsa-miR-32*     | 1 | 0,003 |

|                 |              |       |
|-----------------|--------------|-------|
| hsa-miR-200b    | 1            | 0,002 |
| hsa-miR-208b    | 1            | 0,002 |
| hsa-miR-214     | 1            | 0,002 |
| hsa-miR-24-1*   | 1            | 0,002 |
| hsa-miR-25*     | 1            | 0,002 |
| hsa-miR-27a*    | 1            | 0,002 |
| hsa-miR-27b*    | 1            | 0,002 |
| hsa-miR-29b-1*  | 1            | 0,002 |
| hsa-miR-301b    | 1            | 0,002 |
| hsa-miR-30c-1*  | 1            | 0,002 |
| hsa-miR-30d*    | 1            | 0,002 |
| hsa-miR-32*     | 1            | 0,002 |
| hsa-miR-328     | 1            | 0,002 |
| hsa-miR-331-5p  | 1            | 0,002 |
| hsa-miR-335     | 1            | 0,002 |
| hsa-miR-337-5p  | 1            | 0,002 |
| hsa-miR-34b     | 1            | 0,002 |
| hsa-miR-374b*   | 1            | 0,002 |
| hsa-miR-424*    | 1            | 0,002 |
| hsa-miR-504     | 1            | 0,002 |
| hsa-miR-542-3p  | 1            | 0,002 |
| hsa-miR-548b-5p | 1            | 0,002 |
| hsa-miR-570     | 1            | 0,002 |
| hsa-miR-574-5p  | 1            | 0,002 |
| hsa-miR-580     | 1            | 0,002 |
| hsa-miR-625     | 1            | 0,002 |
| hsa-miR-627     | 1            | 0,002 |
| hsa-miR-651     | 1            | 0,002 |
| hsa-miR-886-5p  | 1            | 0,002 |
| hsa-miR-887     | 1            | 0,002 |
| hsa-miR-891a    | 1            | 0,002 |
| hsa-miR-9       | 1            | 0,002 |
| hsa-miR-99a     | 1            | 0,002 |
| sum reads       | <b>54448</b> |       |

|                 |              |       |
|-----------------|--------------|-------|
| hsa-miR-324-5p  | 1            | 0,003 |
| hsa-miR-335*    | 1            | 0,003 |
| hsa-miR-337-3p  | 1            | 0,003 |
| hsa-miR-338-3p  | 1            | 0,003 |
| hsa-miR-340*    | 1            | 0,003 |
| hsa-miR-342-5p  | 1            | 0,003 |
| hsa-miR-34b*    | 1            | 0,003 |
| hsa-miR-363     | 1            | 0,003 |
| hsa-miR-374a*   | 1            | 0,003 |
| hsa-miR-425*    | 1            | 0,003 |
| hsa-miR-487a    | 1            | 0,003 |
| hsa-miR-487b    | 1            | 0,003 |
| hsa-miR-493*    | 1            | 0,003 |
| hsa-miR-497*    | 1            | 0,003 |
| hsa-miR-500*    | 1            | 0,003 |
| hsa-miR-520g    | 1            | 0,003 |
| hsa-miR-545     | 1            | 0,003 |
| hsa-miR-548c-5p | 1            | 0,003 |
| hsa-miR-550     | 1            | 0,003 |
| hsa-miR-550*    | 1            | 0,003 |
| hsa-miR-582-5p  | 1            | 0,003 |
| hsa-miR-625     | 1            | 0,003 |
| hsa-miR-643     | 1            | 0,003 |
| hsa-miR-801     | 1            | 0,003 |
| hsa-miR-874     | 1            | 0,003 |
| hsa-miR-940     | 1            | 0,003 |
| hsa-miR-98      | 1            | 0,003 |
| sum reads       | <b>31285</b> |       |



**Supplementary Table 4:  
Northern Blot Analysis of microRNA  
Expression in EBV + vs. - DLBCLs**

| miRNA       | fold change |                |
|-------------|-------------|----------------|
|             | Libraries   | Northern Blots |
| miR-424     | 3,77        | 1,26           |
| miR-223     | 4,26        | 3,90           |
| miR-199a-3p | 2,28        | 1,26           |
| miR-27b     | 3,55        | 1,77           |
| miR-26b     | 2,35        | 1,15           |
| miR-23a     | 2,27        | 1,14           |
|             |             |                |
| miR-155     | 0,22        | 0,67           |
| miR-20b     | 0,13        | 1,42           |
| miR-221     | 0,25        | 0,69           |
| miR-222     | 0,40        | 0,79           |
| miR-29b/c   | 0,43        | 0,69           |
| miR-106a    | 0,33        | 1,48           |

**Supplementary Table 5: Pathological characteristics of EBV-positive DLBCL used for LMP1 dependent qRT-PCR**

| case | sex | diagnosis     | comment                   | localization    | EBER PCR/ISH | LMP1          | EBNA2 | ZEBRA       | latency | in library | in qRT-pCR |
|------|-----|---------------|---------------------------|-----------------|--------------|---------------|-------|-------------|---------|------------|------------|
| #1   | f   | DLBCL ABC     | Immunoblastic             | cervical        | pos.         | neg.          | neg.  | negative    | I       |            | x          |
| #2   | f   | DLBCL         |                           | stomach         | pos.         | neg.          | neg.  | negative    | I       | x          | x          |
| #3   | f   | DLBCL         |                           | bone            | pos.         | neg.          | neg.  | negative    | I       | x          | x          |
| #4   | m   | DLBCL         |                           | cervical        | pos.         | neg.          | neg.  | negative    | I       |            | x          |
| #5   | m   | MedDLBCL      |                           | mediastinum     | pos.         | neg.          | neg.  | negative    | I       | x          | x          |
| #6   | m   | DLBCL         |                           | skeletal muscle | pos.         | neg.          | neg.  | negative    | I       | x          | x          |
|      |     |               |                           |                 |              |               |       |             |         |            |            |
| #7   | m   | DLBCL ABC     | TCRBCL*                   | axilla          | pos.         | pos.          | neg.  | negative    | II      |            | x          |
| #8   | m   | DLBCL ABC     | anaplastic                | submandibular   | pos.         | pos.          | neg.  | negative    | II      |            | x          |
| #9   | f   | DLBCL ABC     | plasmablastic,imm.suppr.  | In cervical     | pos.         | dot-like pos. | neg.  | few pos.    | lytic   |            | x          |
| #10  | m   | DLBCL ABC     | HIV+, necrotic,imm.suppr. |                 | pos.         | dot-like pos. | neg.  | few pos.    | lytic   |            | x          |
| #11  | m   | anaplast. LCL | CD20neg*, imm.suppr.      | In cervical     | pos.         | pos.          | neg.  | 1 pos. cell | lytic?  |            | x          |
